# Supplementary material for: g-C3N4/dendritic fibrous nanosilica doped with potassium for photocatalytic CO2 reduction
Source: Royal Society of Chemistry journal article supplement (doi:10.1039/d2ma00809b), 2022-01-01
Supplement: d2ma00809b1.pdf [file d2ma00809b1.pdf]

## Supporting Information

### **g-C<sub>3</sub>N<sub>4</sub>/Dendritic Fibrous Nanosilica Doped with Potassium for Photocatalytic CO<sub>2</sub> Reduction**

Sushma A. Rawool, Yusuf Kar, and Vivek Polshettiwar\*,

Department of Chemical Sciences, Tata Institute of Fundamental Research (TIFR), Mumbai, India. Email: vivekpol@tifr.res.in, Phone: (+91) 8452886556

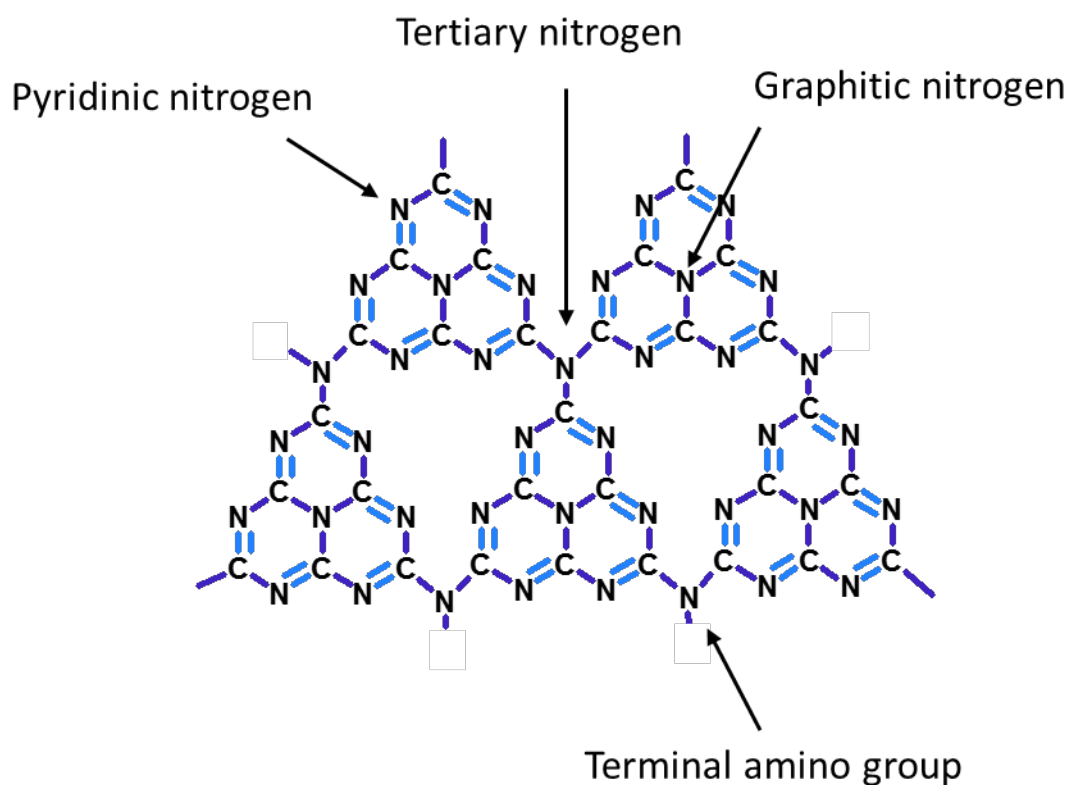

**Scheme 1.** Types of nitrogen present in the framework of g-C<sub>3</sub>N<sub>4</sub>

KOH (x mg, x=8.33, 83.33, 208.33) + Melamine (250 mg) + Water (10 mL)

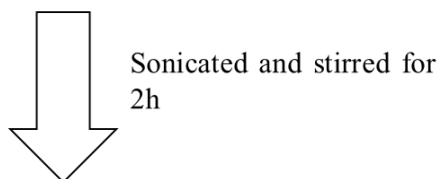

Evaporated to dryness at 80 °C in oven

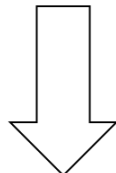

DFNS (500 mg) + K-Melamine (250 mg) + Ethanol (1.25 mL)

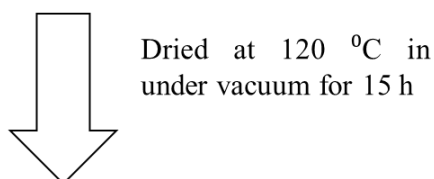

Sample placed in vacuum sealed tube

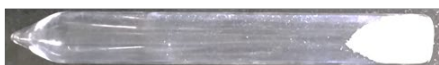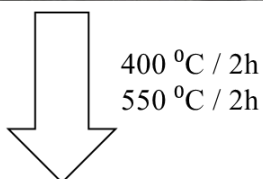

K-g-C<sub>3</sub>N<sub>4</sub> coated DFNS (K-CN/DFNS)

**Fig. S1** Synthesis procedure for the production of K-CN/DFNS using a vacuum-sealed quartz tube

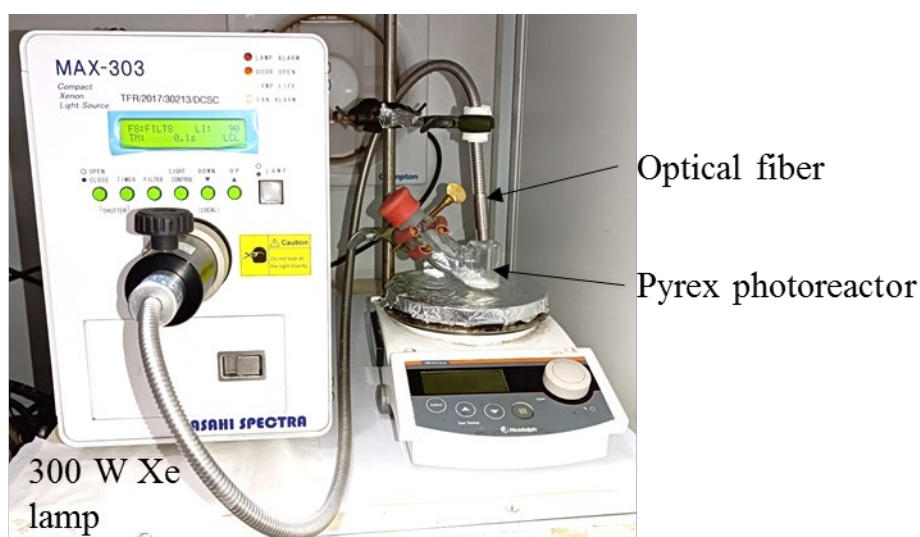

**Fig. S2** Photograph of the experimental setup for the photocatalytic CO<sub>2</sub> conversion.

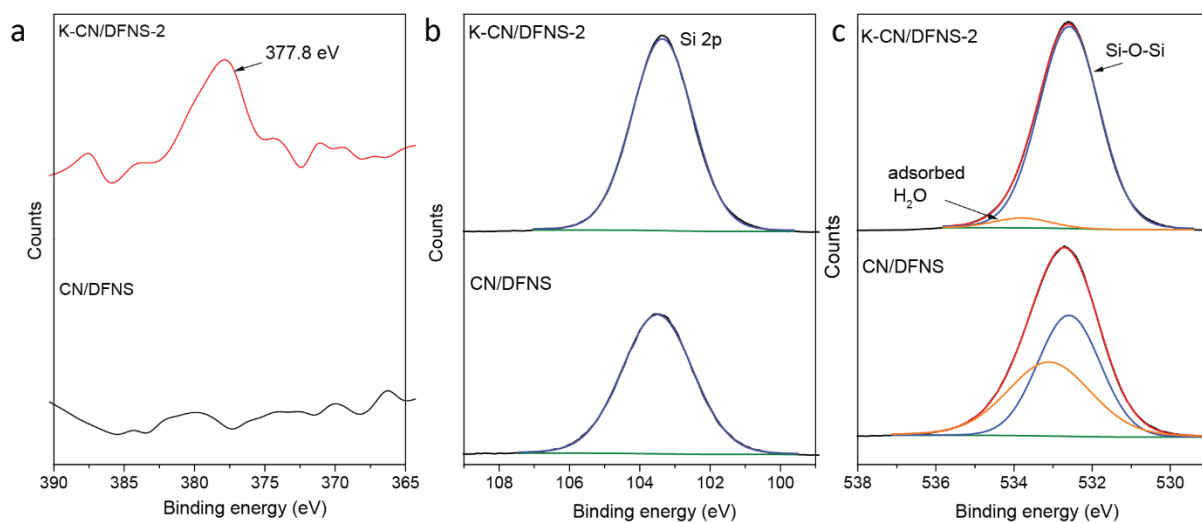

**Fig. S3** High-resolution XPS spectra of a. K 1s, b. Si 2p and c. O 1s of CN/DFNS and K-CN/DFNS-2

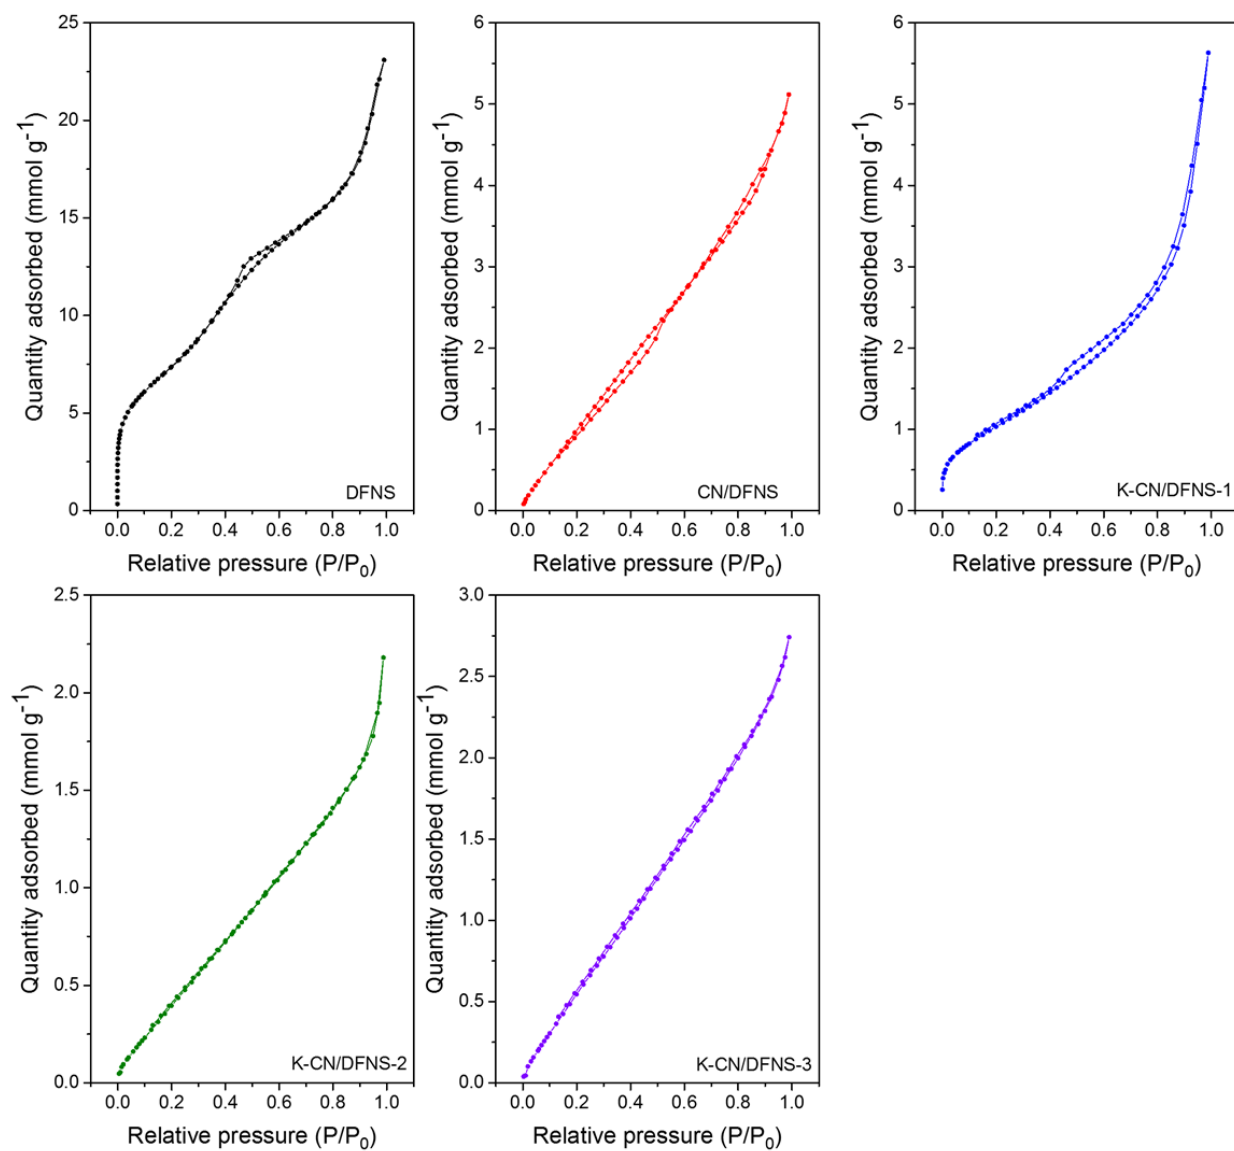

**Fig. S4**  $N_2$  sorption isotherms of DFNS,  $g\text{-C}_3\text{N}_4$ , CN/DFNS and K-CN/DFNS

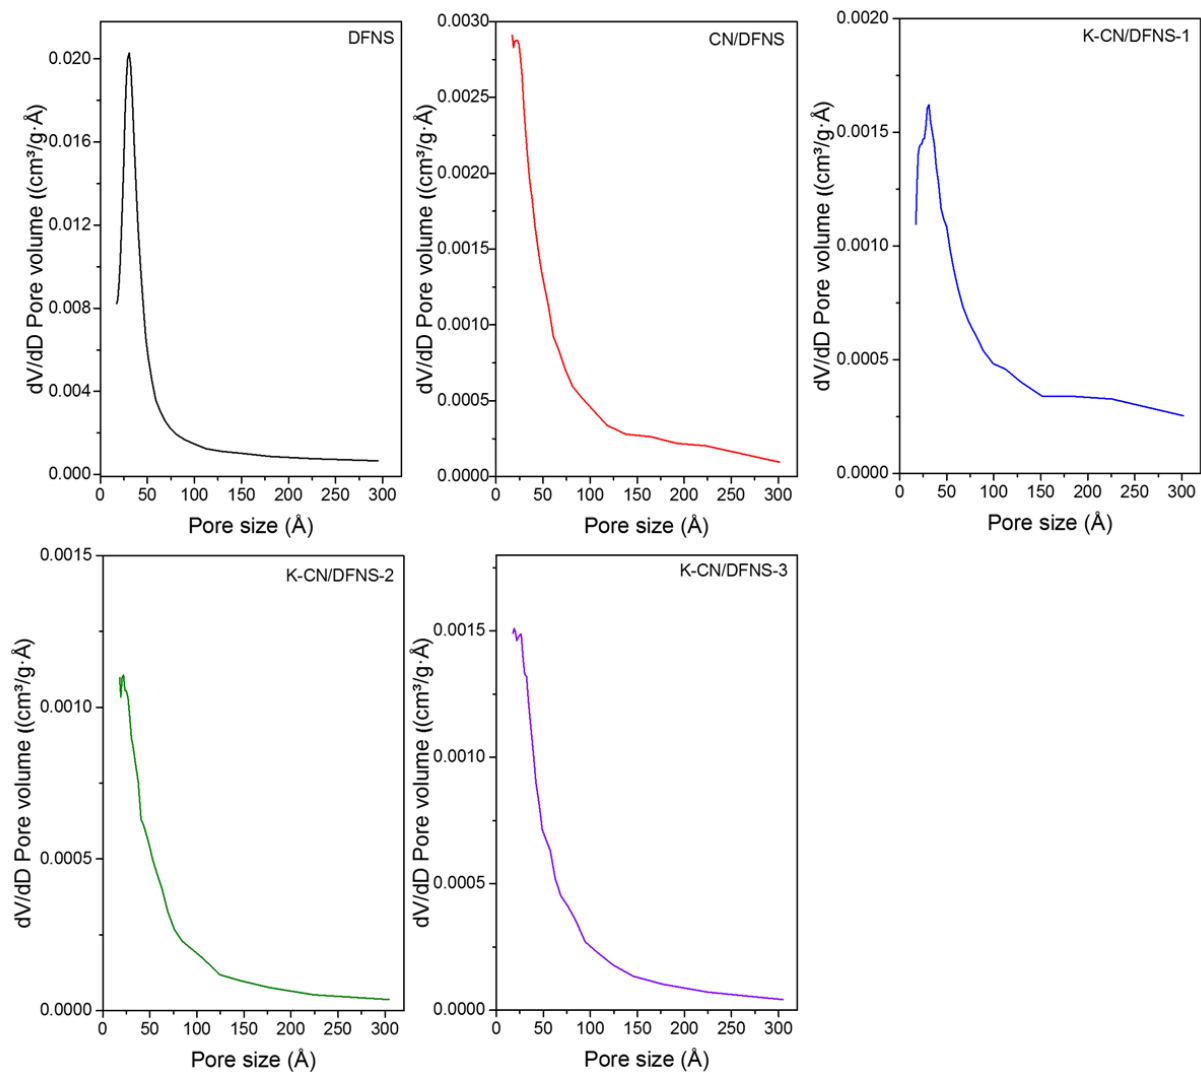

**Fig. S5** BJH pore size distribution of DFNS,  $g\text{-C}_3\text{N}_4$ , CN/DFNS and K-CN/DFNS

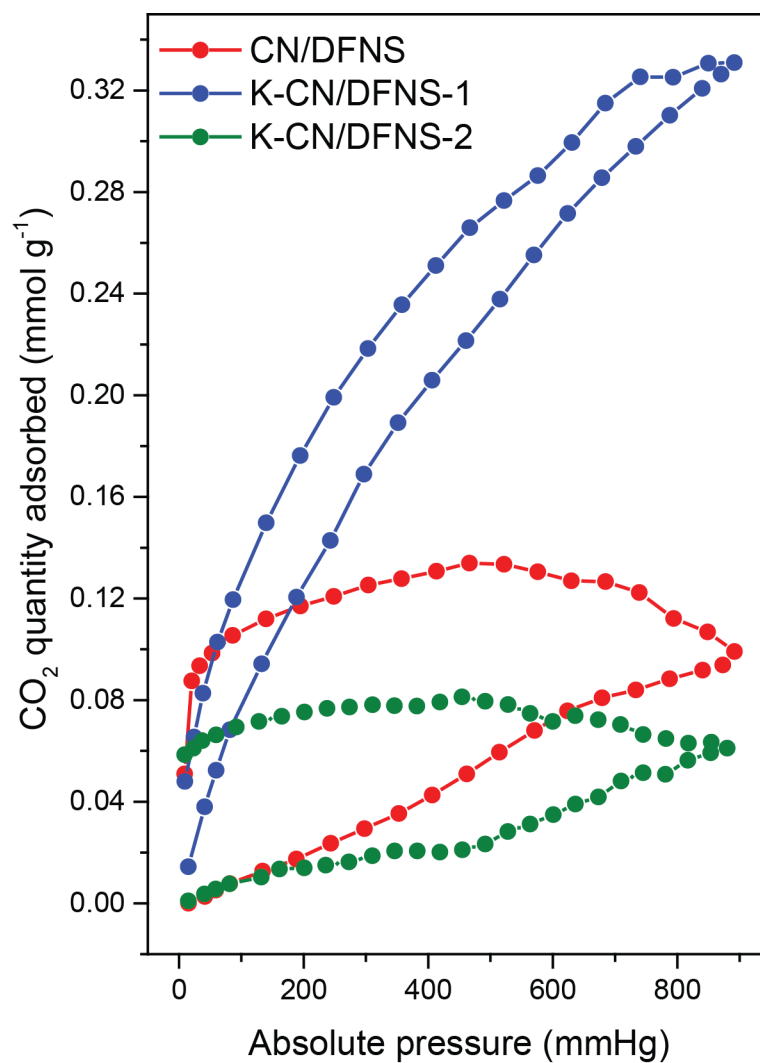

**Fig. S6** CO<sub>2</sub> adsorption-desorption isotherm recorded at 298 K for CN/DFNS, K-CN/DFNS-1 and K-CN/DFNS-2.

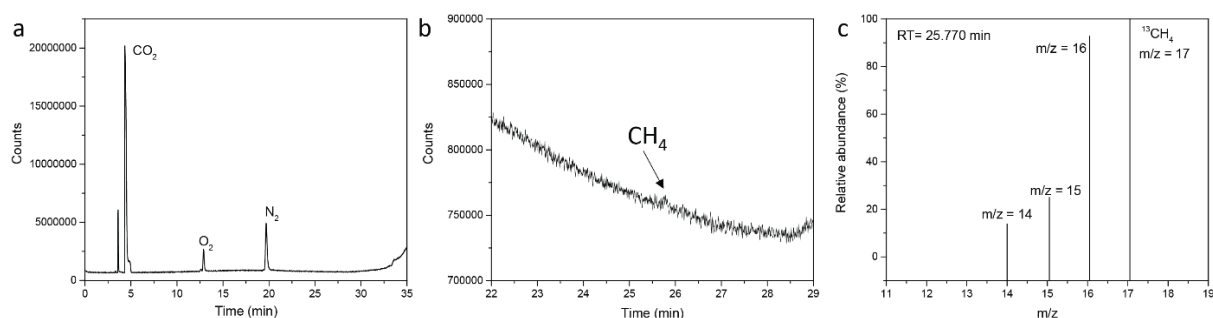

**Fig. S7** a. Gas chromatogram recorded using mass spectrometer (MS) detector, b. enlarged view of chromatogram at 25.77 min and c. mass spectrum at 25.77 min.

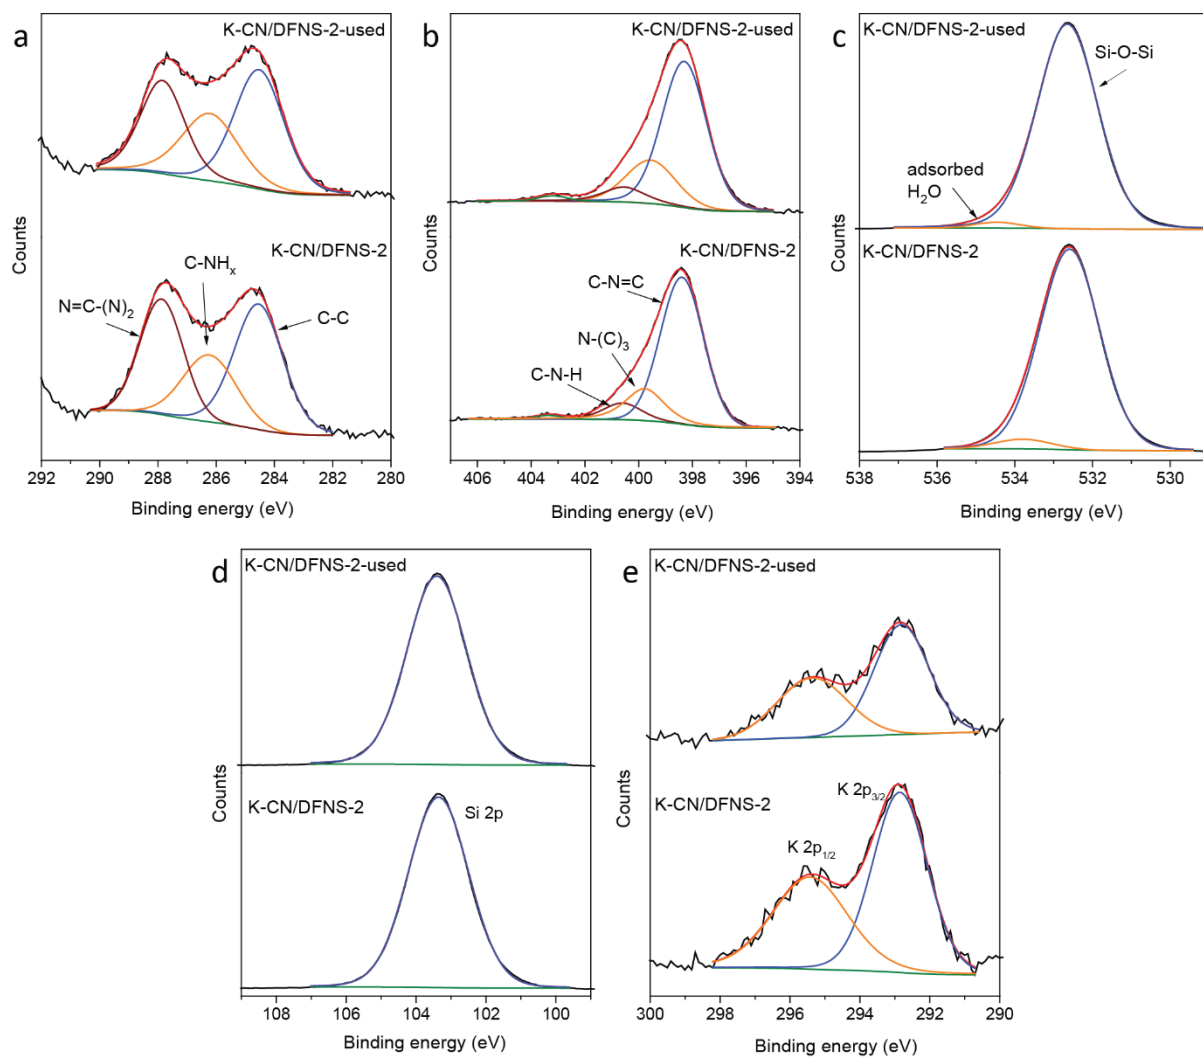

**Fig. S8** High-resolution XPS spectra of a. C 1s, b. N 1s, c. O 1s, d. Si 2p, and e. K 2p of k-CN/DFNS and K-CN/DFNS-2 used

**Table S1:** Comparison of photocatalytic activity of K-CN/DFNS sample with literature

| Sr. No. | Sample                                                                 | Experimental Conditions                              | Light source                                         | CO <sub>2</sub> conversion products               | Reference      |
|---------|------------------------------------------------------------------------|------------------------------------------------------|------------------------------------------------------|---------------------------------------------------|----------------|
| 1       | K-CN/DFNS-2 (6 wt% potassium ion)                                      | 15 mg catalyst, moist CO <sub>2</sub>                | 300 W Xe lamp (385-740 nm, 318 mW cm <sup>-2</sup> ) | CH <sub>4</sub> : 1.7 μmol g <sup>-1</sup> in 4 h | This work      |
| 2       | Potassium doped g-C <sub>3</sub> N <sub>4</sub> (1.85 atom% potassium) | Catalyst dispersed in 2 mL of water, CO <sub>2</sub> | Visible light (simulated by a CEAULIGHT CEL-HXF300)  | CO: 8.7 μmol g <sup>-1</sup> h <sup>-1</sup>      | Wang et al [1] |

|   |                                                                       |                                                                                                                                            |                                                                              |                                                                                                              |                    |
|---|-----------------------------------------------------------------------|--------------------------------------------------------------------------------------------------------------------------------------------|------------------------------------------------------------------------------|--------------------------------------------------------------------------------------------------------------|--------------------|
|   |                                                                       |                                                                                                                                            | with 420 nm cut-off filter)                                                  |                                                                                                              |                    |
| 3 | K-incorporated amino-rich g-C <sub>3</sub> N <sub>4</sub>             | 15 mg catalyst, water vapour, CO <sub>2</sub>                                                                                              | Xe lamp (1 sun simulated sunlight)                                           | CO: ~ 9.6 μmol g <sup>-1</sup> h <sup>-1</sup><br>CH <sub>4</sub> : ~ 8 μmol g <sup>-1</sup> h <sup>-1</sup> | Sun et al [2]      |
| 4 | Amine-functionalized g-C <sub>3</sub> N <sub>4</sub>                  | 100 mg catalyst, CO <sub>2</sub> generated inside the reactor (0.084 g NaHCO <sub>3</sub> + 0.3 mL of 2 M H <sub>2</sub> SO <sub>4</sub> ) | 300 W Xe                                                                     | CH <sub>4</sub> : 0.34<br>CH <sub>3</sub> OH: 0.28                                                           | Huang et al [3]    |
| 5 | Sulfur doped g-C <sub>3</sub> N <sub>4</sub>                          | 100 mg catalyst, CO <sub>2</sub> generated inside the photoreactor (NaHCO <sub>3</sub> + HCl)                                              | 300-W simulated solar Xe arc lamp                                            | CH <sub>3</sub> OH: 1.12 μmol g <sup>-1</sup> in 3h                                                          | Wang et al [4]     |
| 6 | P doped and cyano group incorporated g-C <sub>3</sub> N <sub>4</sub>  | 100 mg catalyst + 1 M NaHCO <sub>3</sub> + CO <sub>2</sub>                                                                                 | 300 W Xe lamp equipped with a 420 nm cut-off filter, 200 mW cm <sup>-2</sup> | CO: 1.17 μmol g <sup>-1</sup> in 3h                                                                          | Liu et al [5]      |
| 6 | Nonmetal (B, P, O and S) doped porous g-C <sub>3</sub> N <sub>4</sub> | 50 mg catalyst dispersed in 100 mL of water, CO <sub>2</sub>                                                                               | UV lamp (100-280 nm)                                                         | CH <sub>4</sub> : 55.1 nmol (ml of H <sub>2</sub> O) <sup>-1</sup> g <sup>-1</sup> h <sup>-1</sup>           | Arumugam et al [6] |

#### References:

1. Wang, S.; Zhan, J.; Chen, K.; Ali, A.; Zeng, L.; Zhao, H.; Hu, W.; Zhu, L.; Xu, X. Potassium-Doped g-C<sub>3</sub>N<sub>4</sub> Achieving Efficient Visible-Light-Driven CO<sub>2</sub> Reduction, *ACS Sustainable Chem. Eng.* **2020**, 8(22), 8214–8222.



2. Sun, Z.; Wang, S.; Li, Q.; Lyu, M.; Butburee, T.; Luo, B.; Wang, H.; Fischer, J. M. T. A.; Zhang, C.; Wu, Z. Wang, L. Enriching CO<sub>2</sub> Activation sites on graphitic carbon nitride with simultaneous introduction of electron-transfer promoters for superior photocatalytic CO<sub>2</sub>-to-fuel conversion, *Adv. Sustainable Syst.*, **2017**, 1, 1700003.
3. Huang, Q.; Yuab, J.; Cao, S.; Cui, C.; Cheng, B. Efficient photocatalytic reduction of CO<sub>2</sub> by amine-functionalized g-C<sub>3</sub>N<sub>4</sub>, *Appl. Surf. Sci.* **2015**, 358, 350–355.
4. Wang, K.; Li, Q.; Liu, B.; Cheng, B.; Ho, W.; Yu, J. Sulfur-doped g-C<sub>3</sub>N<sub>4</sub> with enhanced photocatalytic CO<sub>2</sub>- reduction performance, *Applied Catalysis B: Environmental*, **2015**, 176–177, 44-52.
5. Liu, X.; Wang, P.; Zhai, H.; Zhang, Q.; Huang, B.; Wang, Z.; Liu, Y.; Dai, Y.; Qin, X.; Zhang, X. Synthesis of synergetic phosphorus and cyano groups (-C≡N) modified g-C<sub>3</sub>N<sub>4</sub> for enhanced photocatalytic H<sub>2</sub> production and CO<sub>2</sub> reduction under visible light irradiation, *Appl. Catal. B: Environ.* **2018**, 232, 521-530.
6. Arumugam, M.; Tahir, M.; Praserthdam, P. Effect of nonmetals (B, O, P, and S) doped with porous g-C<sub>3</sub>N<sub>4</sub> for improved electron transfer towards photocatalytic CO<sub>2</sub> reduction with water into CH<sub>4</sub>, *Chemosphere*, **2022**, 286(2), 131765.
